# Supplementary material for: KAP1 regulates endogenous retroviruses in adult human cells and contributes to innate immune control
Source: PubMed Central journal article supplement (PMC6172469; doi:10.15252/embr.201745000), 2018-07-30
Supplement: EMBR-19-e45000-s001.pdf [file EMBR-19-e45000-s001.pdf]

# Appendix

## **KAP1 regulates ERVs in adult human cells and contributes to innate immune control**

Christopher H.C. Tie<sup>1</sup>, Liane Fernandes<sup>1</sup>, Lucia Conde<sup>2</sup>, Luisa Robbez-Masson<sup>1</sup>, Rebecca P. Sumner<sup>1</sup>, Tom Peacock<sup>1</sup>, Maria Teresa Rodriguez-Plata<sup>1</sup>, Greta Mickute<sup>1</sup>, Robert Gifford<sup>3</sup>, Greg J. Towers<sup>1</sup>, Javier Herrero<sup>2</sup> and Helen M. Rowe<sup>1</sup>

<sup>1</sup>Division of Infection and Immunity, Cruciform Building, University College London, WC1E 6BT, UK

<sup>2</sup>Bill Lyons Informatics Centre, UCL Cancer Institute, Paul O’Gorman Building, 72 Huntley Street, London WC1E 6BT, UK

<sup>3</sup>MRC-University of Glasgow Centre for Virus Research, G61 1QH, UK

Corresponding author: [h.rowe@ucl.ac.uk](mailto:h.rowe@ucl.ac.uk)

### **Appendix Table of Contents**

|                           |          |
|---------------------------|----------|
| Appendix Figure S1        | Page 2   |
| Appendix Figure S2        | Page 3   |
| Appendix Table S1         | Page 4   |
| Appendix Table S2         | Page 5-6 |
| Appendix Table S3         | Page 7   |
| Appendix Figure S1 Legend | Page 8   |
| Appendix Figure S2 Legend | Page 9   |

# Appendix Figure S1

A.

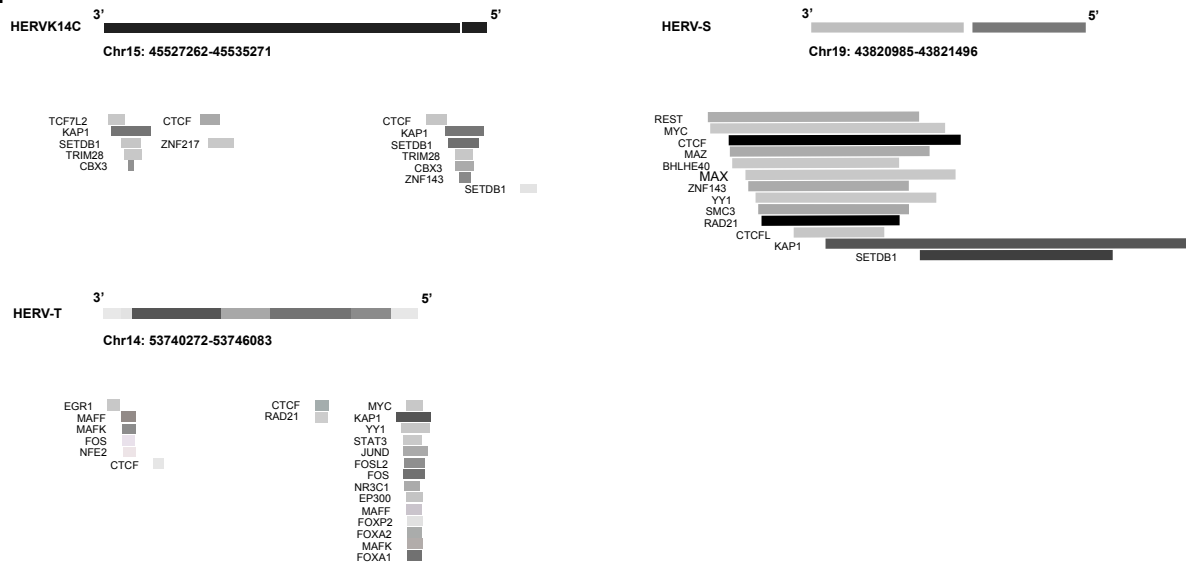

B.

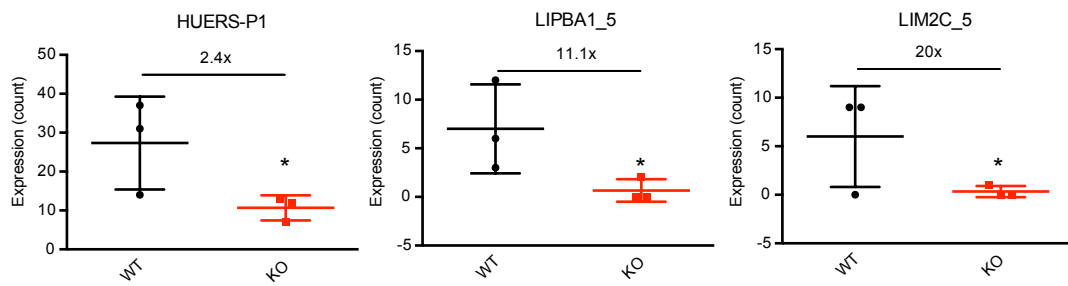

## Appendix Figure S2

A.

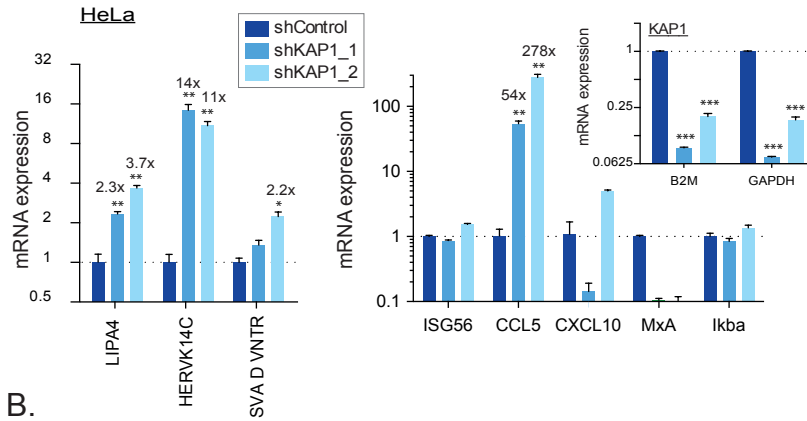

B.

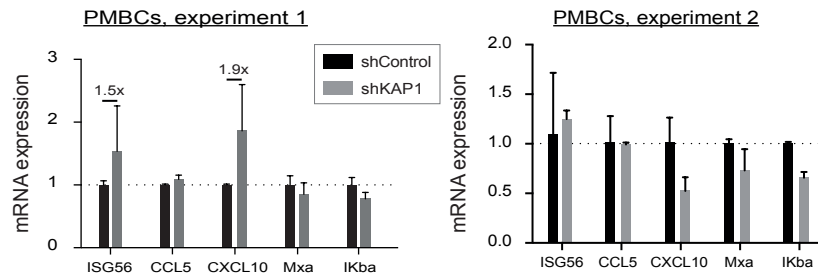

C.

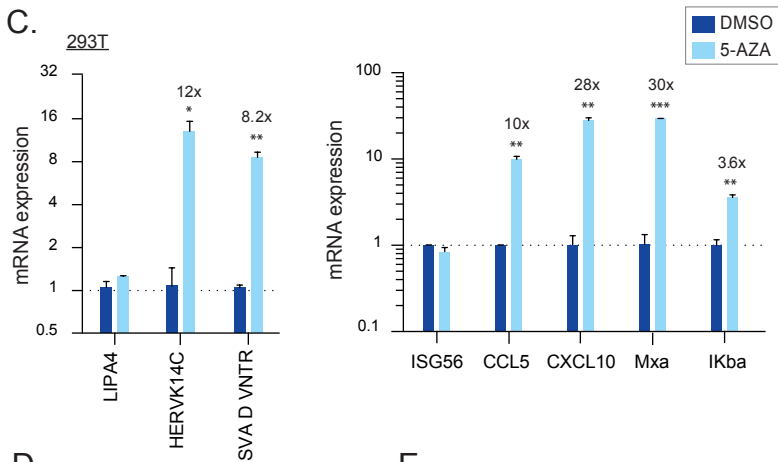

D.

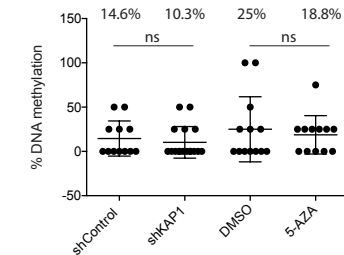

E.

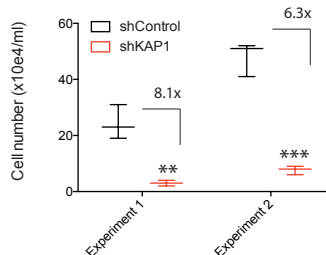

## Appendix Table S1

### Antibodies

|                                            |                             |                     |
|--------------------------------------------|-----------------------------|---------------------|
| Actin                                      | Chemicon,<br>MAB1501        | mouse<br>monoclonal |
| KAP1                                       | Millipore,<br>MAB3662       | mouse<br>monoclonal |
| PCNA                                       | Millipore,<br>clone PC10    | mouse<br>monoclonal |
| OCT3/4                                     | Santa Cruz,<br>sc-5279      | mouse<br>monoclonal |
| PE-Cy 5<br>CD3 (ε-<br>chain)               | BD<br>Bioscience,<br>555341 | mouse               |
| FITC - CD4                                 | BD<br>Bioscience,<br>345768 | mouse               |
| PE -<br>OCT3/4                             | eBioscience,<br>12-5841-80  | rat                 |
| FITC IgG1<br>(κ Isotype<br>Control)        | BD<br>Bioscience,<br>555909 | mouse               |
| PE-Cy 5<br>IgG2a (κ<br>Isotype<br>Control) | BD<br>Bioscience,<br>555575 | mouse               |
| PE IgG2a (κ<br>Isotype<br>Control)         | eBioscience,<br>12-4321-80  | rat                 |

## Appendix Table S2

| Primer         | Strand | Sequence (5' -3')                                                                             |
|----------------|--------|-----------------------------------------------------------------------------------------------|
| <b>qRT-PCR</b> |        |                                                                                               |
| B2M            | F      | TGC TCG CGC TAC TCT CTC TTT                                                                   |
|                | R      | TCT GCT GGA TGA CGT GAG TAA AC                                                                |
| GAPDH          | F      | GGG AAA CTG TGG CGT GAT                                                                       |
|                | R      | GGA GGA GTG GGT GTC GCT GTT                                                                   |
| KAP1           | F      | AAG GAC CAT ACT GTG CGC TCT AC                                                                |
|                | R      | ACG TTG CAA TAG ACA GTA CGT TCA C                                                             |
| LIPA4_1        | F      | TCA CCA ATA TCC GCT GTT CTG                                                                   |
|                | R      | GTC TGT TGG AGT TTA CTG GAG G                                                                 |
| LIPA4_2        | F      | TGA TAC CCA GGC AAA CAG G                                                                     |
|                | R      | TCT AAC AGT CAG GAC CCT CAG                                                                   |
| HERVK14C_1     | F      | AAY AGC ACT GGA GCC CTT                                                                       |
|                | R      | CGA CTG TGA TGG TTS AYT TTG                                                                   |
| HERVK14C_2     | F      | GTA ATT GTG AGT ACC CAA AAT CTC                                                               |
|                | R      | ACC TTG TCC CAA TCT TTT AC                                                                    |
| SVA D VNTR     | F      | GCT GCC CAT CGT CTG AG                                                                        |
|                | R      | TCC TCA CCT CCC AGA CAG                                                                       |
| ISG56          | F      | CCT GAA AGG CCA GAA TGA GG                                                                    |
|                | R      | TCC ACC TTG TCC AGG TAA GT                                                                    |
| CCL5           | F      | CCC AGC AGT CGT CTT TGT CA                                                                    |
|                | R      | TCC CGA ACC CAT TTC TTC TCT                                                                   |
| CXCL10         | F      | GTG GCA TTC AAG GAG TAC CTC                                                                   |
|                | R      | GCC TTC GAT TCT GGA TTC AGA                                                                   |
| Mx $\alpha$    | F      | ATC CTG GGA TTT TGG GGC TT                                                                    |
|                | R      | CCG CTT GTC GCT GGT GTC G                                                                     |
| Ik $\beta$     | F      | CTC CGA GAC TTT CGA GGA AAT                                                                   |
|                | R      | GCC ATT GTA GTT GGT AGC CTT                                                                   |
| <b>shRNA</b>   |        |                                                                                               |
| shKAP1_1       | F      | GAT CCG TAA GCA CAG GTT TGG TCT CAG TTC AAG AGA CTG AGA CCA AAC CTG TGC TTA TTT TTT ACG CGT G |
|                | R      | AAT TCA CGC GTA AAA AAT AAG CAC AGG TTT GGT CTC AGT CTC TTG AAC TGA GAC CAA ACC TGT GCT TAC G |
| shKAP1_2       | F      | GAT CCG TAA GAA CTG GTA CTG GTG GTC TTC AAG AGA GAC CAC CAG TAC CAG TTC TTA TTT TTT ACG CGT G |
|                | R      | AAT TCA CGC GTA AAA AAT AAG AAC TGG TAC TGG TGG TCT CTC TTG AAG ACC ACC AGT ACC AGT TCT TAC G |
| <b>sgRNA</b>   |        |                                                                                               |
| KAP1_ Ex1      | F      | CAC CGG AGC GCT TTT CGC CGC CAG                                                               |
|                | R      | AAA CCT GGC GGC GAA AAG CGC TCC                                                               |
| KAP1_ Ex9      | F      | CAC CGC GTC CTG GCA CTA ACT CAA C                                                             |
|                | R      | AAA CGT TGA GTT AGT GCC AGG ACG C                                                             |

|                     |  |                         |
|---------------------|--|-------------------------|
| STING               |  | TCCATCCATCCCGTGTCCCAGGG |
| MAVS                |  | CAGGGAACCGGGACACCCUC    |
| Non-targeting sgRNA |  | ACGGAGGCTAAGCGTCGCAA    |

#### DNA methylation

|              |   |                                     |
|--------------|---|-------------------------------------|
| HERVK14C_LTR | F | AGG TTT AGG AAG GTG GAT TAT TTG     |
|              | R | ACA ACC CAA AAC TCT CAA ACT CTA C   |
| OCT4         | F | ATT TGT TTT TTG GGT AGT TAA AGG T   |
|              | R | CCA ACT ATC TTC ATC TTA ATA ACA TCC |
| SVAs         | F | TTGTAATTTTTTTGTTTGATTTTTTTGT        |
|              | R | TACTCTCAACCTAAACACCATTA             |

#### Sequencing

|        |   |                            |
|--------|---|----------------------------|
| T7     | - | TAA TAC GAC TCA CTA TAG GG |
| CPPT_F | - | CAG GCC CGA AGG AAT AGA AG |

#### Reporter

|           |   |                                                                                                    |
|-----------|---|----------------------------------------------------------------------------------------------------|
| Con_LTR   | F | TCG AGG CAC GCG TTC TGG CGC CCA ACG TGG GGC TCC CCA TAA TCC                                        |
|           | R | TCG AGG ATT ATG GGG AGC CCC ACG TTG GGC GCC AGA ACG CGT GCC                                        |
| Chr15_LTR | F | GCC TCG AGG GAT TAT GGG GAG CCC CAT GTT GGG CGC CAG AGC ACG CGT TGT GAG AAA GAG AGT TTC TGA GGT GC |
|           | R | GCG GAT CCT GTT GGG GAA ACC AGC CC                                                                 |
| LTR       | F | GCC TCG AGA GAC CTG TGA GAA AGA GAG TTT CTG AGG TGC                                                |
|           | R | GCG GAT CCT GTT GGG GAA ACC AGC CC                                                                 |

#### Taqman qPCR

|               |       |                                                  |
|---------------|-------|--------------------------------------------------|
| GFP           | F     | CTG CTG CCC GAC AAC CAC                          |
|               | R     | ACC ATG TGA TCG CGC TTC TC                       |
|               | Probe | CCA GTC CGC CCC TGA GCA AAG ACC                  |
| Human Albumin | F     | GCT GTT CAT CTT GTG GGC TGT                      |
|               | R     | ACT CAT GGG AGC TGC TGG TTC                      |
|               | Probe | [6FAM] CCT GTC ATG CCC ACA CAA ATC TCT CC [BHQ1] |

#### ChIP qPCR

|        |   |                        |
|--------|---|------------------------|
| ZNF180 | F | TGATGCACAATAAGTCGAGCA  |
| ZNF180 | R | TGCAGTCAATGTGGGAAGTC   |
| ZNF239 | F | GGAGAAATCCCATGAGGGTAA  |
| ZNF239 | R | GGCTTTTGTGAGAATGTTTTCC |
| GAPDH  | F | CACCGTCAAGGCTGAGAACG   |
| GAPDH  | R | ATACCCAAGGGAGCCACACC   |

**Appendix Table S3**

| Gene Name                                                          | Species      |
|--------------------------------------------------------------------|--------------|
| 2'-5'-oligoadenylate synthetase like(OASL)                         | Homo sapiens |
| TNF receptor superfamily member 21(TNFRSF21)                       | Homo sapiens |
| complement C1r subcomponent like(C1RL)                             | Homo sapiens |
| complement C1s(C1S)                                                | Homo sapiens |
| complement C3(C3)                                                  | Homo sapiens |
| complement factor B(CFB)                                           | Homo sapiens |
| complement factor D(CFD)                                           | Homo sapiens |
| interferon gamma inducible protein 16(IFI16)                       | Homo sapiens |
| interferon induced protein with tetratricopeptide repeats 2(IFIT2) | Homo sapiens |
| major histocompatibility complex, class I, A(HLA-A)                | Homo sapiens |
| major histocompatibility complex, class I, B(HLA-B)                | Homo sapiens |
| proteasome subunit beta 9(PSMB9)                                   | Homo sapiens |

## Appendix Figure S1 Legend.

### Examples of KAP1-regulated repeat elements.

(A) Examples of ERV loci that are bound by KAP1 and potentially act as regulatory hubs through multiple transcription factor interactions as revealed by ENCODE data. (B) Repeats significantly downregulated ( $>2$  fold where  $p \leq 0.05$ , using DESeq2) in KAP1 knockout HeLa clones compared to control cells based on mRNA-sequencing data.  $p = 0.0188$  (HUERS-P1),  $0.0228$  (L1PBA1\_5),  $0.0417$  (L1M2C\_5). All numbers above bars depict fold changes compared to control cells (to one decimal place).



## Appendix Figure S2 Legend.

### Cytosine methylation acts on KAP1-regulated retrotransposons and prevents innate immune activation

(A) ERV reactivation (left) and partial ISG induction (right) in HeLa cells following depletion of KAP1 (day 6 time-point) with normalization to *B2M* and *GAPDH* respectively. This is a repeat experiment of that shown in Figure 4A. Two-tailed unpaired t tests were performed and p-values are: L1PA4: 0.009, 0.003; HERVK14C: 0.006, 0.004; SVA D VNTR: 0.012; CCL5: 0.005, 0.007. (B) PBMCs depleted for KAP1 (see Figure 1F and S1F) were assessed for induction of ISGs (day 6) by qRT-PCR with *GAPDH* normalization. Two-tailed unpaired t tests showed no significant difference: p values = 0.4083 for *ISG56* and p = 0.2401 for *CXCL10*. (C) 293T cells were treated with 5-AZA or a DMSO control and expression of endogenous repeats (left) and ISGs (right) was measured by qRT-PCR at day 6 post transduction with normalization to *B2M* and *GAPDH* respectively. p-values: HERVK14C: 0.018; SVA D VNTR: 0.005; CCL5: 0.004; CXCL10: 0.003; Mxa: 0.00006; IKba: 0.007. (D) HERVK14C LTR methylation over 4CpGs day 5 post shRNA or day 2 post 5-AZA treatment (see also Figure 4C). Mann-Whitney tests showed p values of 0.4280 (*shControl* vs. *shKAP1*) and 0.9634 (DMSO vs. 5-AZA). 5-AZA was added to all experiments at 7 $\mu$ M. (E) HeLa cell counts day 5 post transduction with *shKAP1* or *shControl* vectors. p values from unpaired t tests are 0.004 (experiment 1) and 0.0004 (experiment 2). All numbers above bars depict fold changes compared to control cells (to one decimal place).
