# Supplementary material for: KAP1 regulates endogenous retroviruses in adult human cells and contributes to innate immune control
Source: PubMed Central journal article supplement (PMC6172469; doi:10.15252/embr.201745000), 2018-07-30
Supplement: EMBR-19-e45000-s008.pdf [file EMBR-19-e45000-s008.pdf]

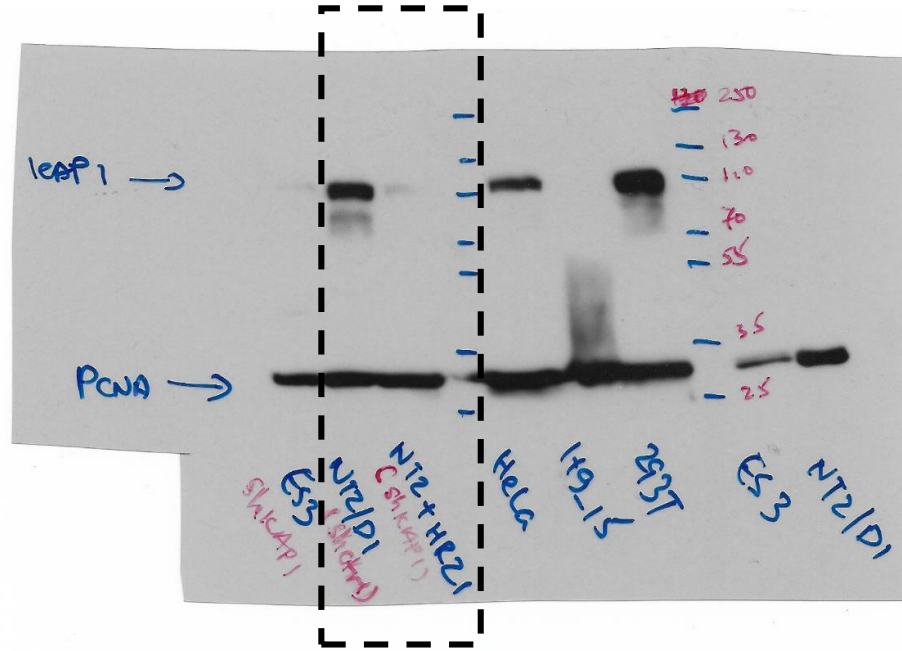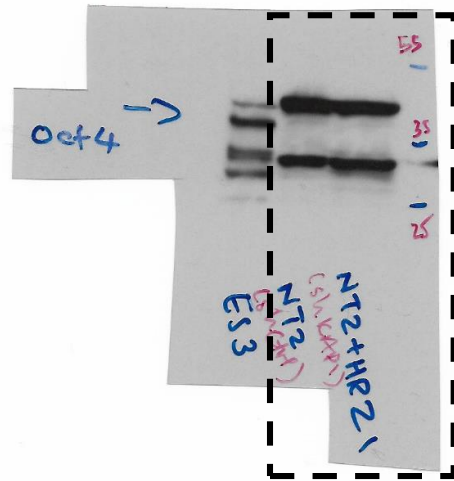

Figure 1C

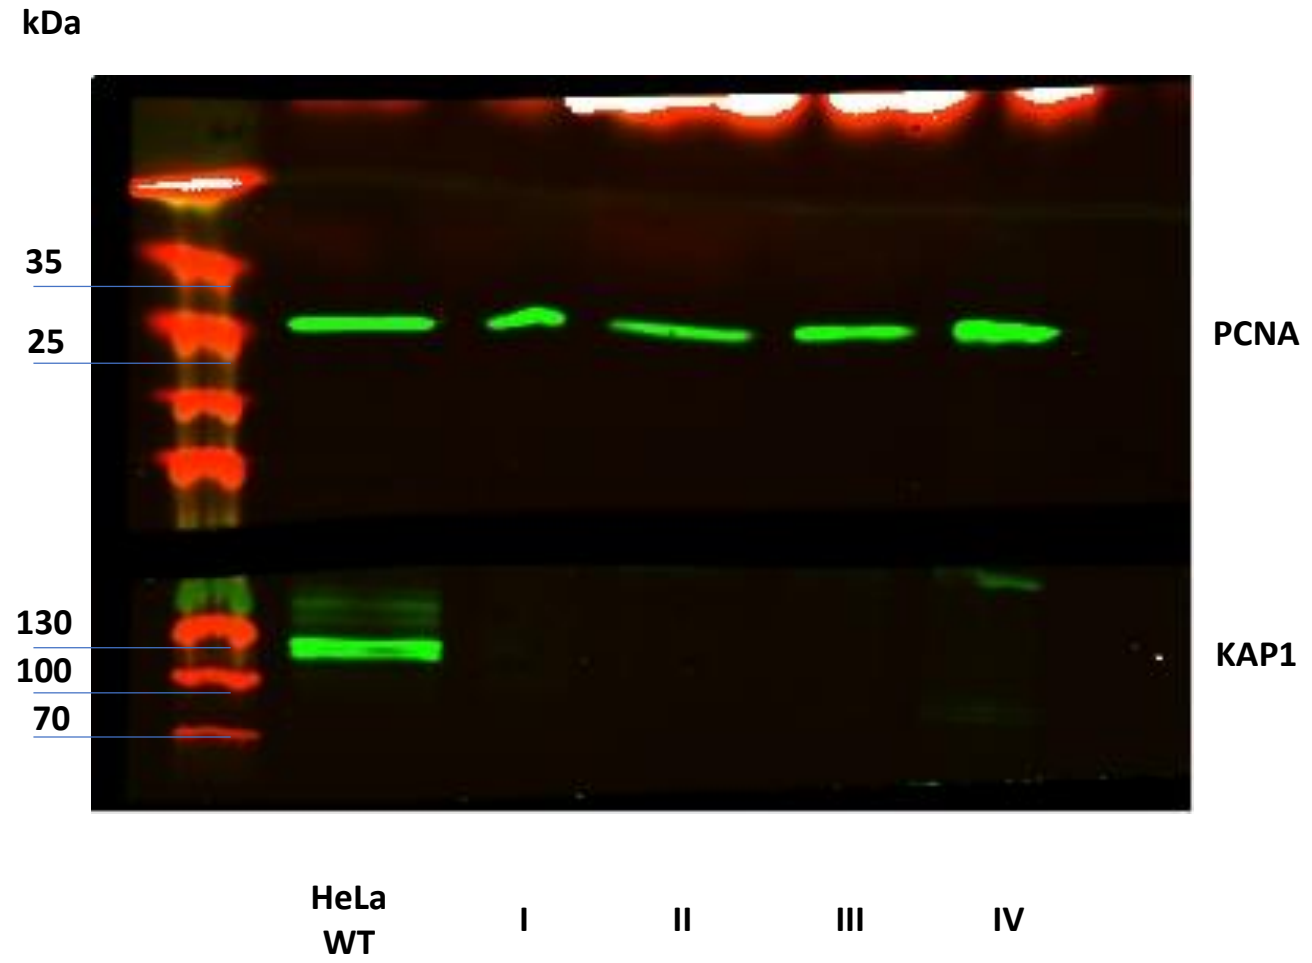

Figure 1D

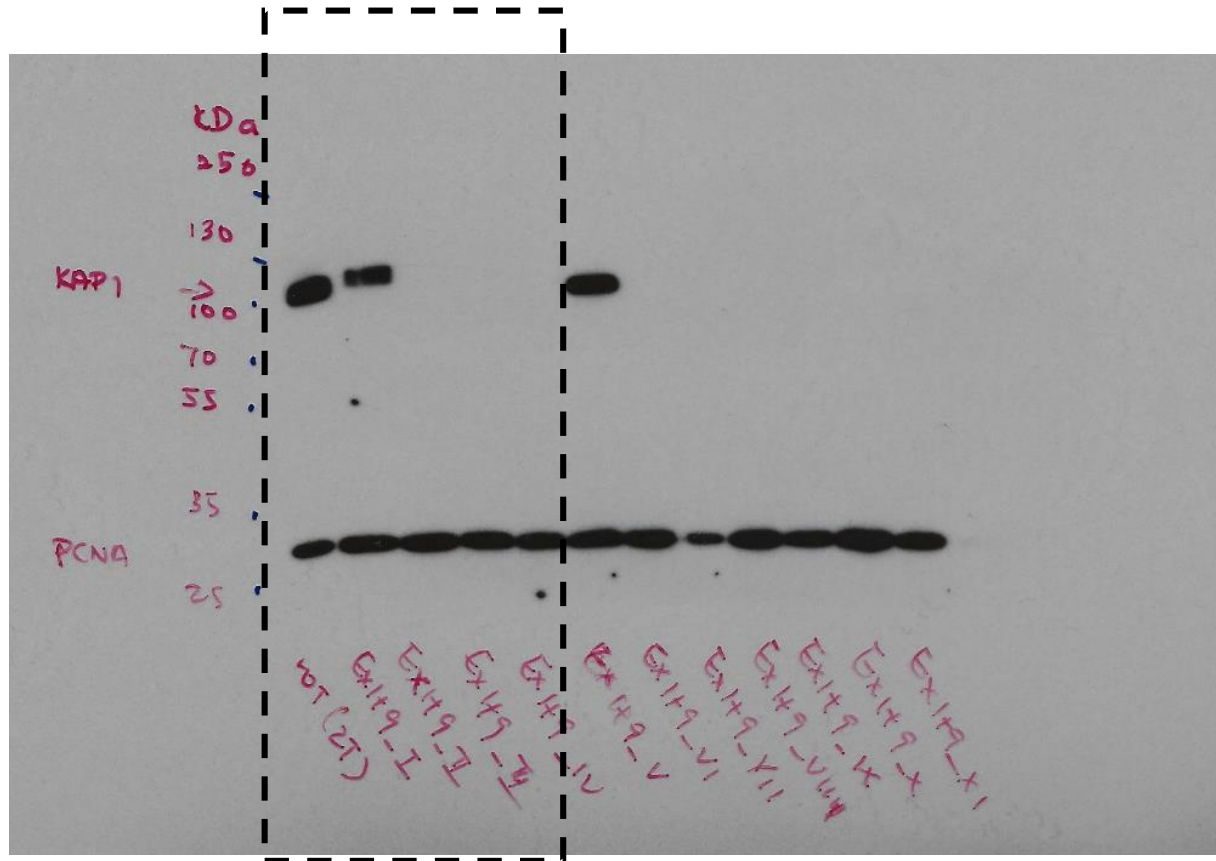

Figure 1E
