# Supplementary material for: KAP1 regulates endogenous retroviruses in adult human cells and contributes to innate immune control
Source: PubMed Central journal article supplement (PMC6172469; doi:10.15252/embr.201745000), 2018-07-30
Supplement: EMBR-19-e45000-s009.pdf [file EMBR-19-e45000-s009.pdf]

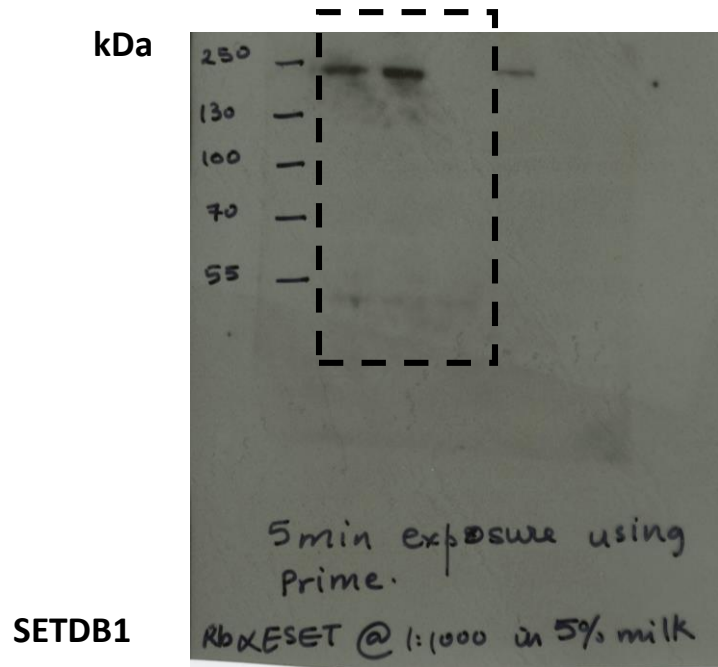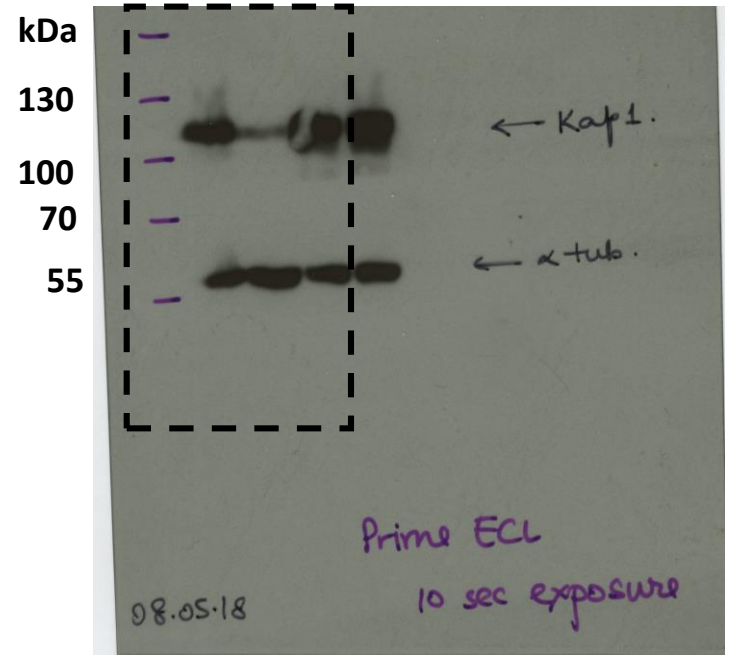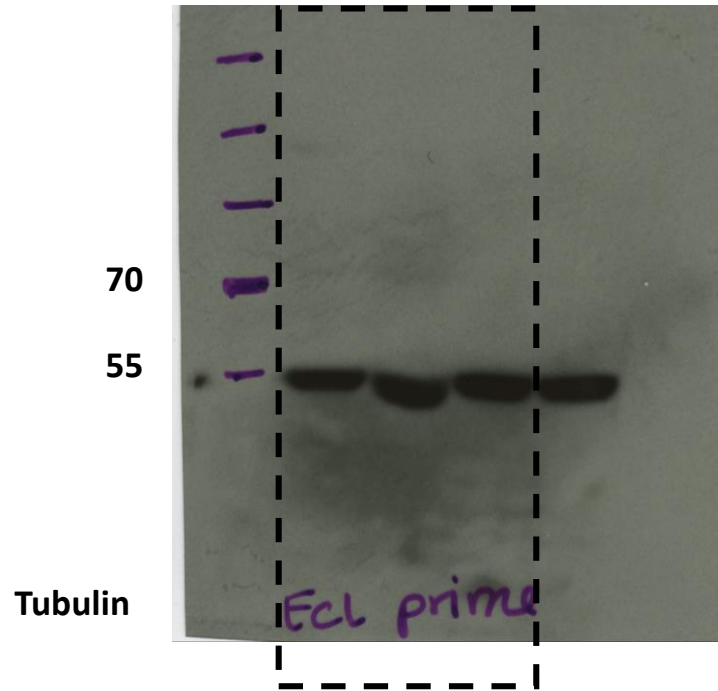

- Sample order (Left to right):
1. shControl
  2. shKAP1
  3. shSETDB1

Figure 5B

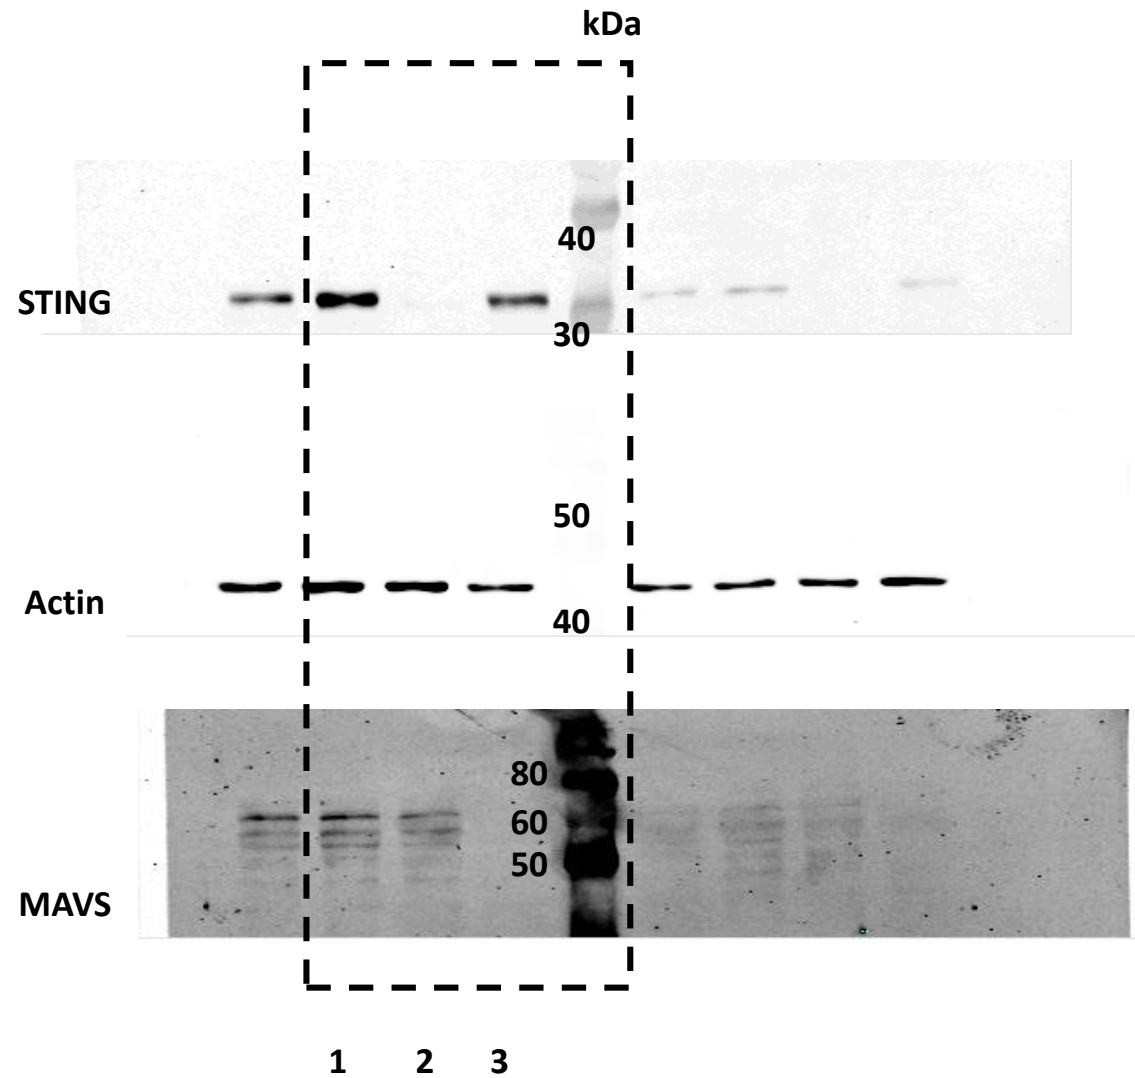

Sample order (Left to right):

1. THP-1 WT
2. THP-1 STING KO
3. THP-1 MAVS KO
